# Supplementary material
Source: MDPI journal article supplement (https://www.mdpi.com/2079-6412/5/3/293)
Supplement: s1 [file s1]

## Supplemental Materials

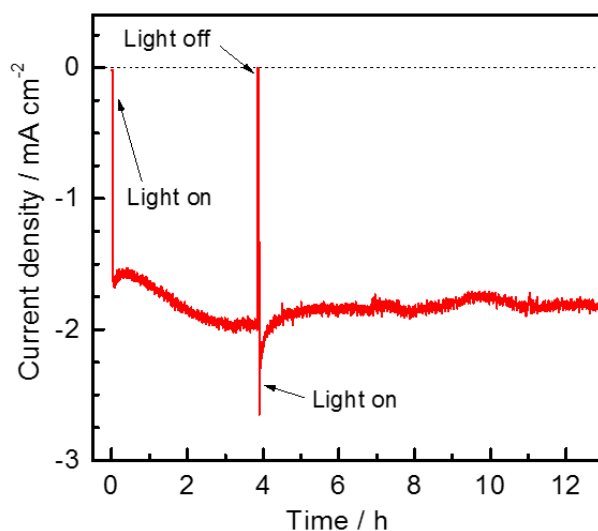

**Figure S1.** Current-time curve at 0  $V_{\text{RHE}}$  for Pt/AGSe electrode. A 150 W Xe lamp was used as light source. A 0.1 M aqueous  $\text{Na}_2\text{SO}_4$  solution (adjusted to pH 9 by NaOH addition) was employed as the electrolyte.

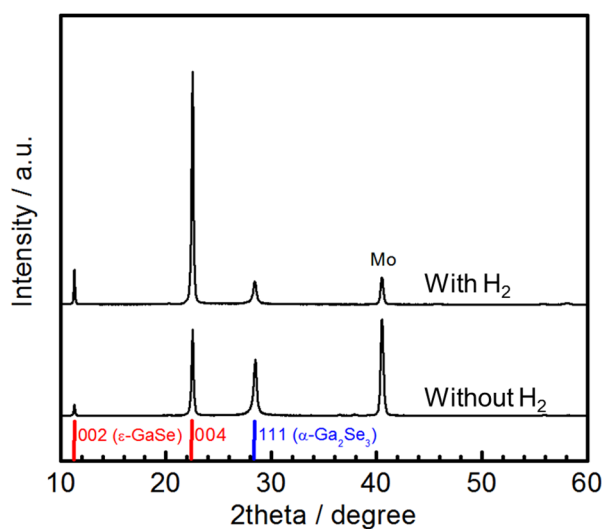

**Figure S2.** XRD patterns of AGSe film (Ag/Ga = 2%) with/without hydrogen gas introduction during AGSe deposition.

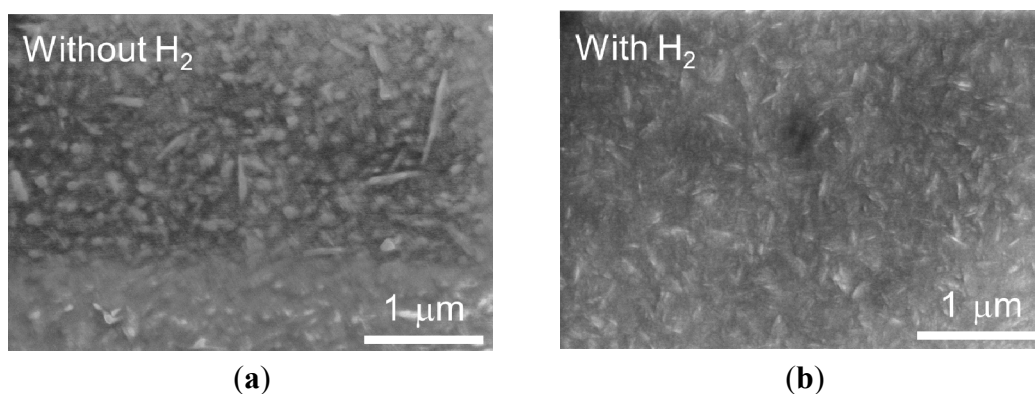

**Figure S3.** SEM plan view of AGSe film (Ag/Ga = 2%) with/without hydrogen gas introduction during AGSe deposition.

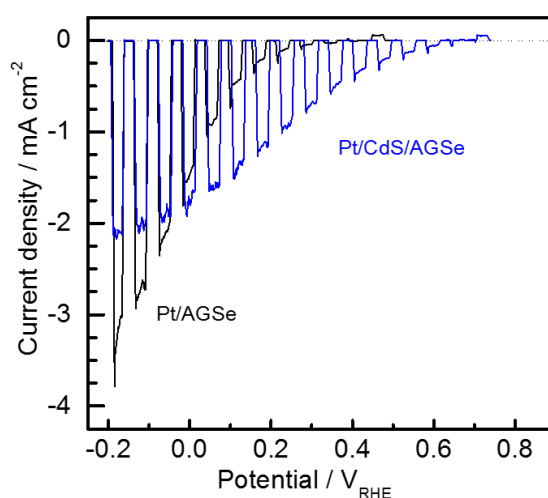

**Figure S4.** Current-potential curves of Pt/AGSe and Pt/CdS/AGSe electrodes without hydrogen gas introduction during AGSe deposition. A 0.1 M aqueous Na<sub>2</sub>SO<sub>4</sub> solution (adjusted to pH 9 by NaOH addition) was employed as the electrolyte.

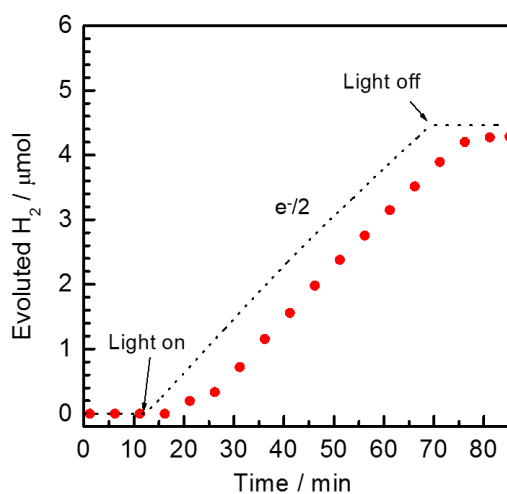

**Figure S5.** Amount of evolved hydrogen from Pt/CdS/AGSe(H<sub>2</sub>) electrode under irradiation by a 300 W Xe lamp at 0 V<sub>RHE</sub>. A 0.1 M aqueous Na<sub>2</sub>SO<sub>4</sub> solution (adjusted to pH 9 by NaOH addition) was employed as the electrolyte.
